# Supplementary material
Source: Springer Nature journal article supplement (https://www.springermedizin.de/resource/supplementary/12908_2010_101_MOESM1_ESM.pdf/9525158)

Number of diabetic patients with ADR in the French Pharmacovigilance database

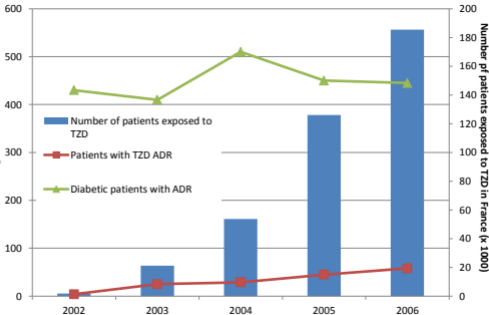

Supplement: MOESM1 [file 9525158]
